# Supplementary material
Source: publisher figshare collection journal article supplement (https://acs.figshare.com/ndownloader/files/4032901)
Supplement: Supplementary file 1 [file 4032901]

# Non-conjugated anionic polyelectrolyte as an interfacial layer for the organic optoelectronic devices

*Gyeong Eun Lim,<sup>†</sup> Ye Eun Ha,<sup>†</sup> Mi Young Jo,<sup>†</sup> Juyun Park,<sup>‡</sup> Yong-Cheol Kang,<sup>‡</sup> and Joo Hyun Kim<sup>†,\*</sup>*

<sup>†</sup>Department of Polymer Engineering and <sup>‡</sup>Department of Chemistry, Pukyong National University,  
Busan 608-739, Korea.

\* Corresponding author email : [jkim@pknu.ac.kr](mailto:jkim@pknu.ac.kr).

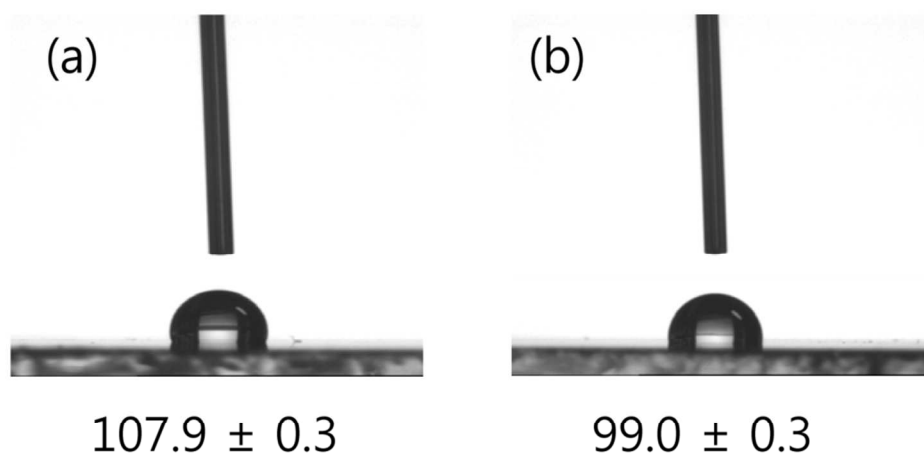

Figure S1. The water contact angle on (a) the active layer (P3HT:PCBM blend) and (b) the PSS-Na coated active layer.

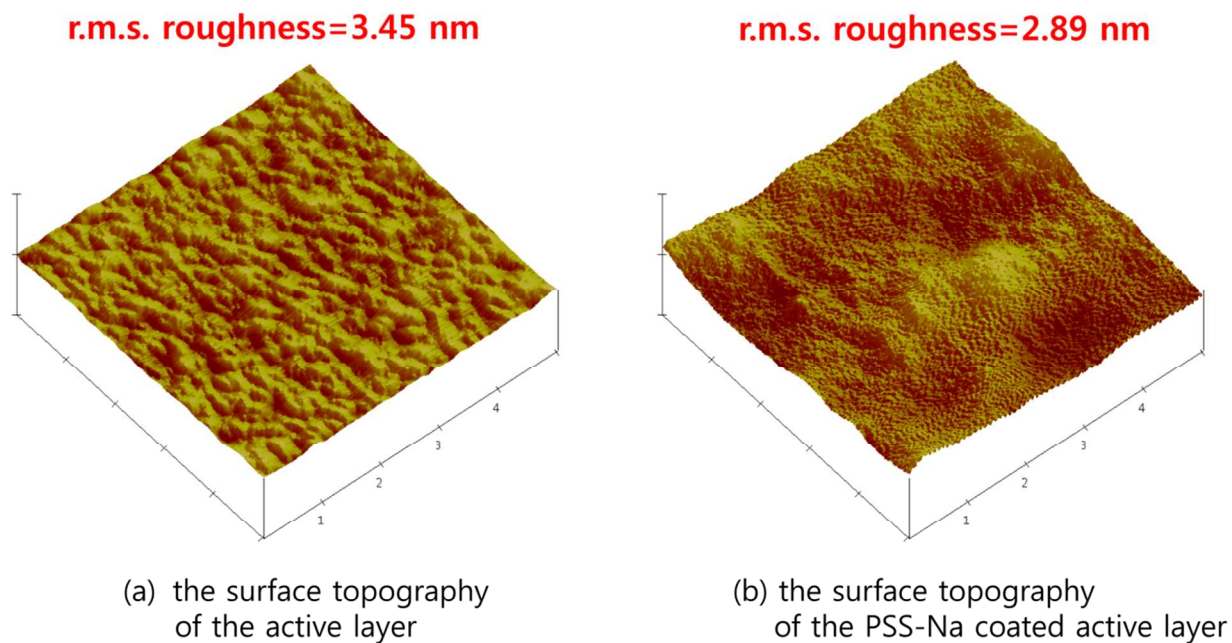

Figure S2. The surface topography of (a) the active layer (b) the PSS-Na film spin-coated from the concentration of 0.5 mg/mL on the active layer. (x, y = 1  $\mu\text{m}/\text{div.}$ , z = 100 nm/div.)

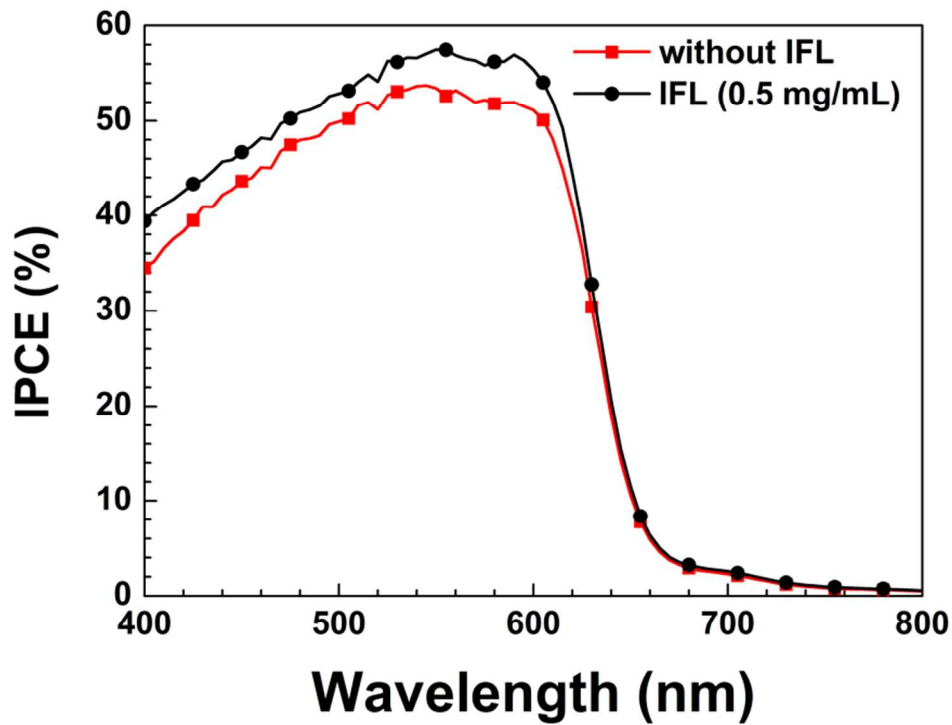

Figure S3. IPCE spectrum of PSCs. The incident photon to collected electron efficiency (IPCE), external quantum efficiency, was calculated by:

$$\text{IPCE (\%)} = 1240 \times J_{\text{sc}} / \left( \frac{\lambda}{I_{\text{p}}} \right)$$

where  $J_{\text{sc}}$  ( $\mu\text{A}/\text{cm}^2$ ) is the short circuit current density measured at the wavelength  $\lambda$  (nm) and  $I_{\text{p}}$  ( $\text{W}/\text{m}^2$ ).
